# Supplementary material for: Evolution of plastid genomes of Holcoglossum (Orchidaceae) with recent radiation
Source: PubMed Central journal article supplement (PMC6390633; doi:10.1186/s12862-019-1384-5), 2019-02-26
Supplement: 12862_2019_1384_MOESM3_ESM.pdf [file 12862_2019_1384_MOESM3_ESM.pdf]

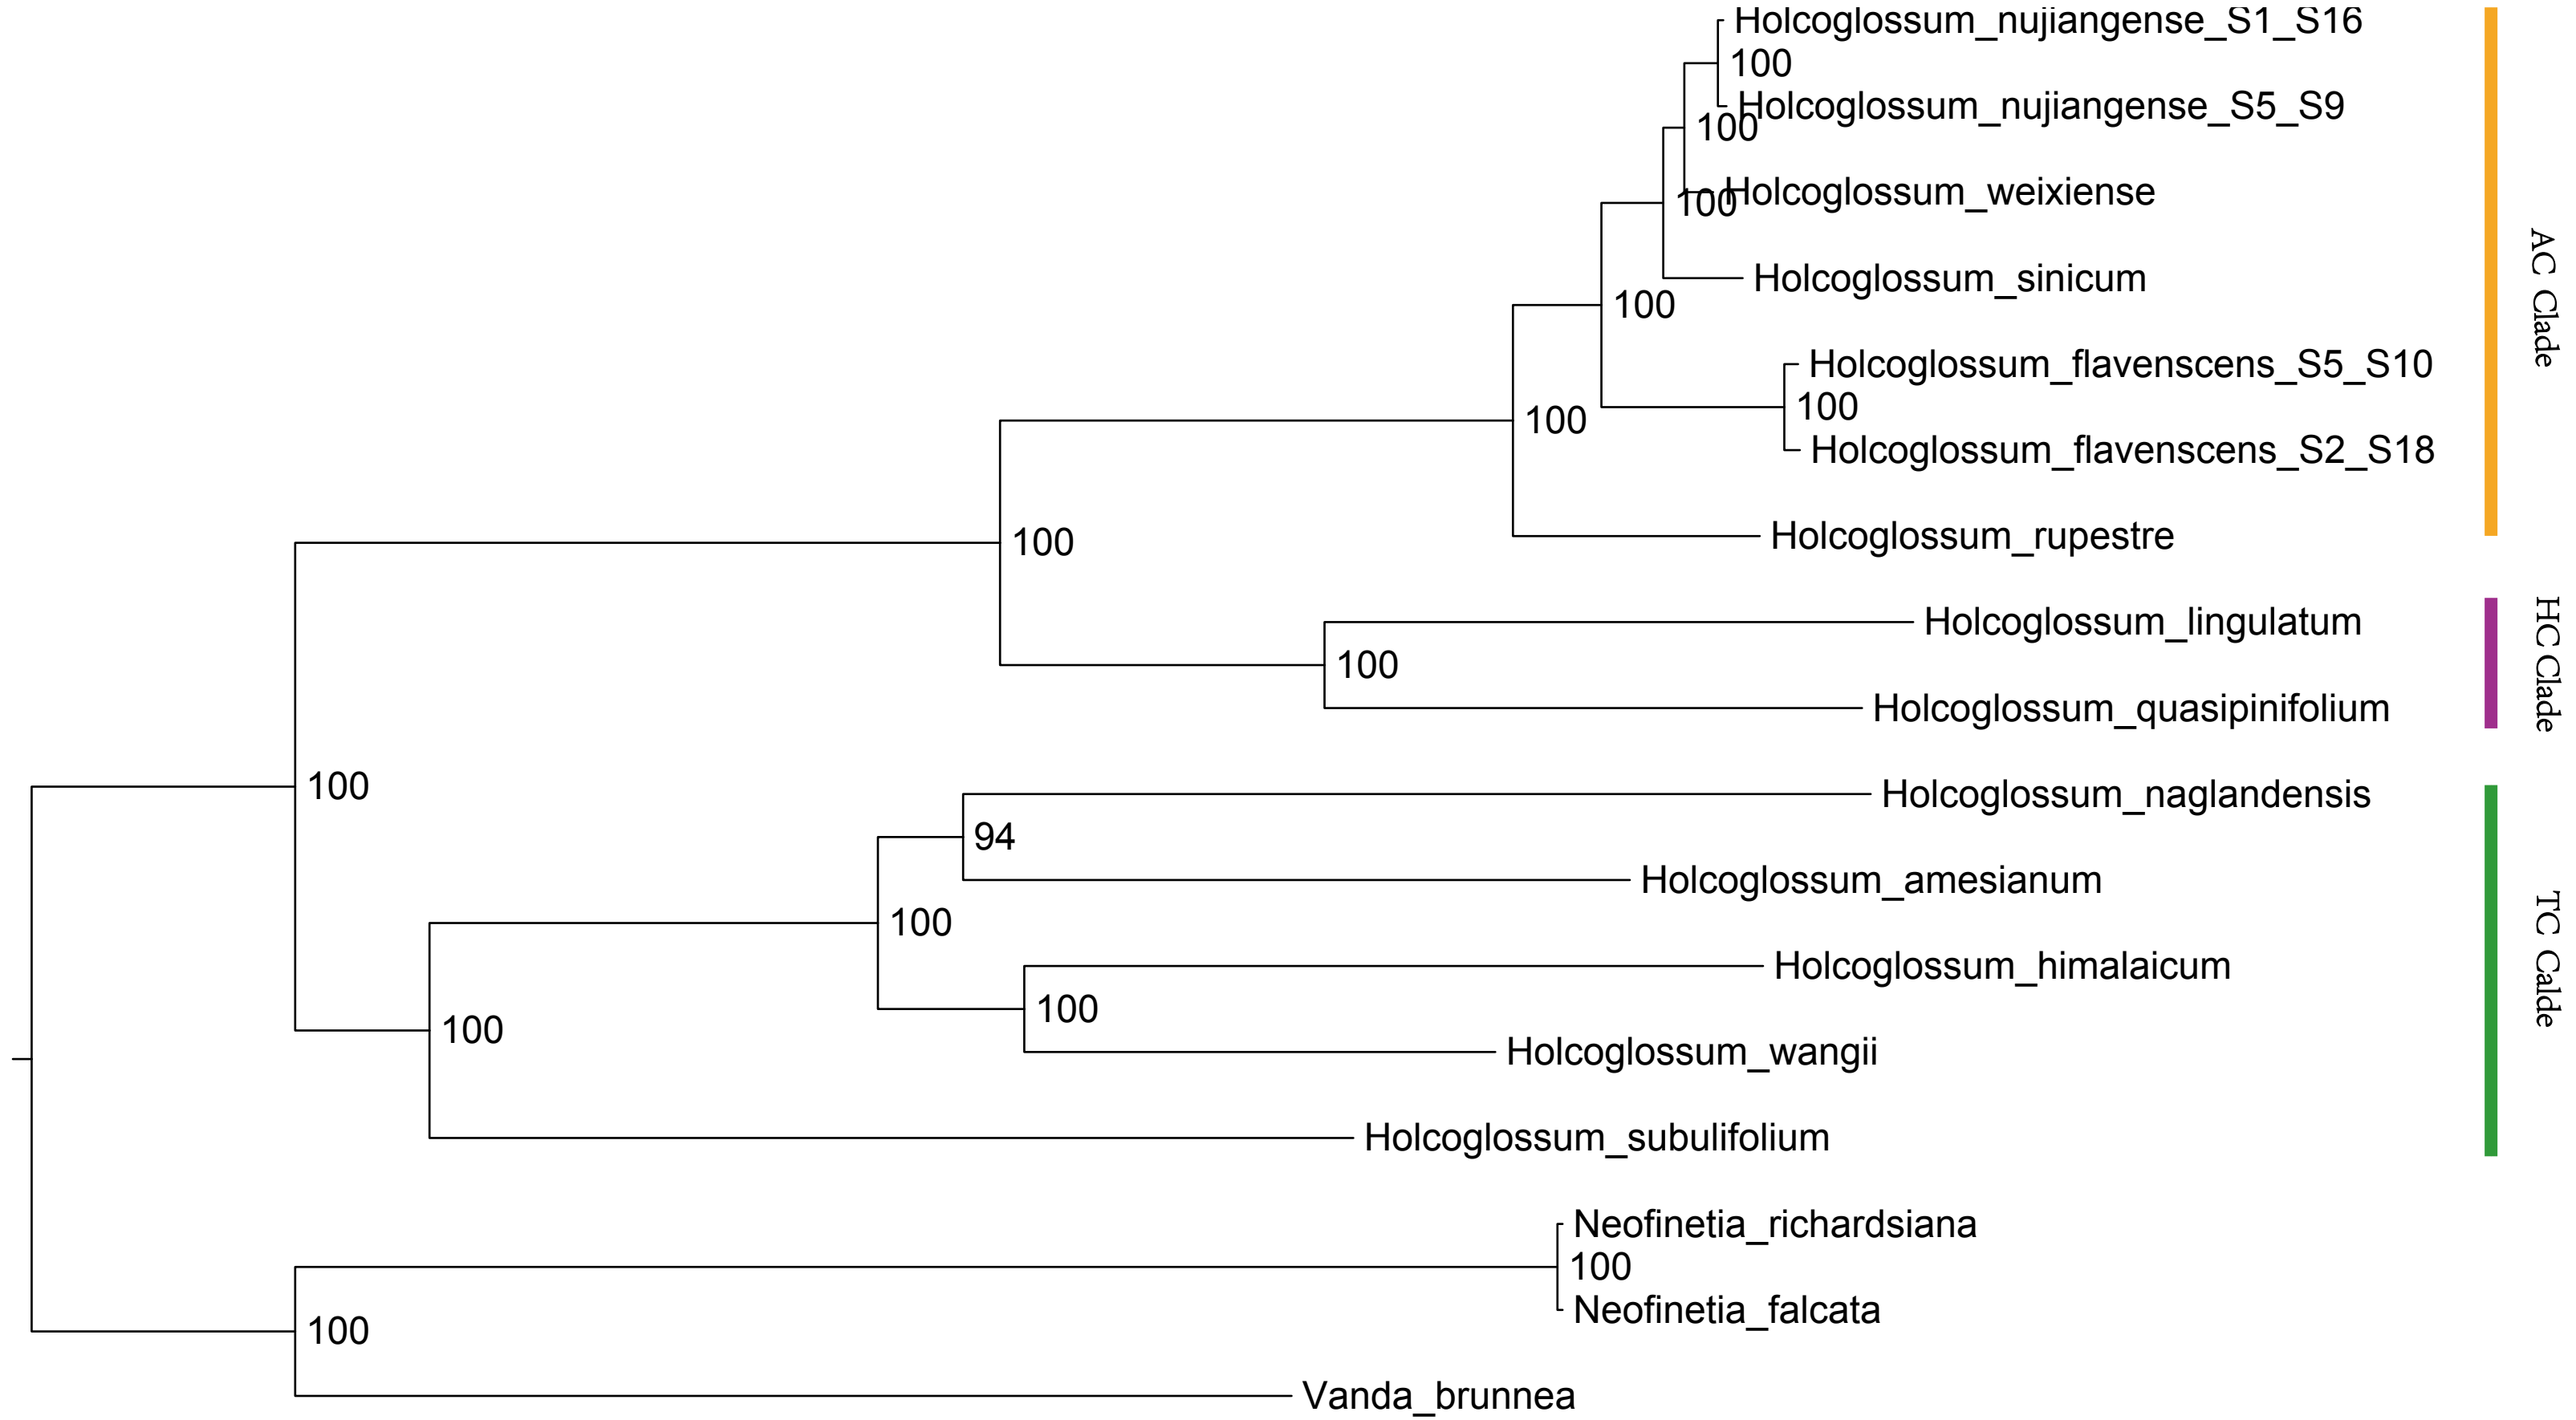

0.002
